# Supplementary material for: Synthesis and reactivity of a uranium(iv) complex supported by a monoanionic nitrogen–phosphorus ligand
Source: Royal Society of Chemistry journal article supplement (doi:10.1039/d3qi01447a), 2023-01-01
Supplement: d3qi01447a1.pdf [file d3qi01447a1.pdf]

## Supporting Information

for

### **Synthesis and Reactivity of Uranium(IV) Complex Supported by Monoanionic Nitrogen-Phosphorus Ligand**

Kai Li, Jialu He, Yue Zhao, Congqing Zhu\*

State Key Laboratory of Coordination Chemistry, Jiangsu Key Laboratory of Advanced Organic Materials, School of Chemistry and Chemical Engineering, Nanjing University, Nanjing 210023, China

\*Correspondence and requests for materials should be addressed to C.Z. (E-mail: zcq@nju.edu.cn)

**Table S1.** Crystal data and structure refinements for **1** and **2**.

| Complex                                                    | <b>1</b>                                                                        | <b>2</b>                                                                       |
|------------------------------------------------------------|---------------------------------------------------------------------------------|--------------------------------------------------------------------------------|
| Formula                                                    | C <sub>20</sub> H <sub>48</sub> Cl <sub>2</sub> N <sub>4</sub> P <sub>2</sub> U | C <sub>20</sub> H <sub>48</sub> I <sub>2</sub> N <sub>4</sub> P <sub>2</sub> U |
| <i>Mr</i> [g/mol]                                          | 715.49                                                                          | 898.39                                                                         |
| Temp. [K]                                                  | 296.15                                                                          | 193.00                                                                         |
| Crystal system                                             | monoclinic                                                                      | monoclinic                                                                     |
| Space group                                                | P2 <sub>1</sub> /c                                                              | P2 <sub>1</sub> /n                                                             |
| <i>a</i> [Å]                                               | 22.444(6)                                                                       | 8.9014(7)                                                                      |
| <i>b</i> [Å]                                               | 8.321(2)                                                                        | 14.8611(12)                                                                    |
| <i>c</i> [Å]                                               | 16.158(4)                                                                       | 11.4945(10)                                                                    |
| $\alpha$ [°]                                               | 90                                                                              | 90                                                                             |
| $\beta$ [°]                                                | 98.132(8)                                                                       | 96.941(4)                                                                      |
| $\gamma$ [°]                                               | 90                                                                              | 90                                                                             |
| Volume[Å <sup>3</sup> ]                                    | 2987.1(13)                                                                      | 1509.4(2)                                                                      |
| <i>Z</i> / <i>D</i> <sub>calcd.</sub> [g/cm <sup>3</sup> ] | 4/1.591                                                                         | 2/1.977                                                                        |
| $\mu$ [mm <sup>-1</sup> ]                                  | 5.733                                                                           | 23.141                                                                         |
| <i>F</i> (000)                                             | 1408.0                                                                          | 848.0                                                                          |
| $\theta$ range/deg                                         | 5.164 - 54.914                                                                  | 10.132 - 107.77                                                                |
| Index ranges                                               | -21 ≤ <i>h</i> ≤ 29<br>-10 ≤ <i>k</i> ≤ 10<br>-20 ≤ <i>l</i> ≤ 20               | -10 ≤ <i>h</i> ≤ 9<br>-16 ≤ <i>k</i> ≤ 17<br>-13 ≤ <i>l</i> ≤ 13               |
| Collected data                                             | 26266                                                                           | 9293                                                                           |
| Unique data                                                | 6741 [R <sub>int</sub> = 0.0557,<br>R <sub>sigma</sub> = 0.0508]                | 2735 [R <sub>int</sub> = 0.0469,<br>R <sub>sigma</sub> = 0.0376]               |
| Completeness                                               | 99%                                                                             | 99%                                                                            |
| Data/parameters                                            | 6741/0/274                                                                      | 2740/0/139                                                                     |
| GOF on <i>F</i> <sup>2</sup>                               | 1.021                                                                           | 1.192                                                                          |
| Final R indices [ <i>I</i> > 2σ( <i>I</i> )]               | R <sub>1</sub> = 0.0320<br>wR <sub>2</sub> = 0.0633                             | R <sub>1</sub> = 0.0269<br>wR <sub>2</sub> = 0.0747                            |
| Final R indices [all data]                                 | R <sub>1</sub> = 0.0499<br>wR <sub>2</sub> = 0.0715                             | R <sub>1</sub> = 0.0290<br>wR <sub>2</sub> = 0.0756                            |
| Largest diff. peak/hole (e·Å <sup>-3</sup> )               | 1.85/-1.52                                                                      | 1.09/-1.33                                                                     |

**Table S2.** Crystal data and structure refinements for **3** and **4**.

| Complex                                                    | <b>3</b>                                                                           | <b>4</b>                                                                           |
|------------------------------------------------------------|------------------------------------------------------------------------------------|------------------------------------------------------------------------------------|
| Formula                                                    | C <sub>32</sub> H <sub>56</sub> N <sub>4</sub> P <sub>2</sub> U                    | C <sub>29</sub> H <sub>59</sub> N <sub>5</sub> P <sub>2</sub> U                    |
| <i>Mr</i> [g/mol]                                          | 796.77                                                                             | 777.78                                                                             |
| Temp. [K]                                                  | 193.00                                                                             | 296.15                                                                             |
| Crystal system                                             | monoclinic                                                                         | triclinic                                                                          |
| Space group                                                | P2 <sub>1</sub> /c                                                                 | P-1                                                                                |
| <i>a</i> [Å]                                               | 11.1259(5)                                                                         | 10.0133(5)                                                                         |
| <i>b</i> [Å]                                               | 26.0312(11)                                                                        | 12.6600(6)                                                                         |
| <i>c</i> [Å]                                               | 12.8003(5)                                                                         | 14.4679(7)                                                                         |
| $\alpha$ [°]                                               | 90                                                                                 | 79.663(2)                                                                          |
| $\beta$ [°]                                                | 109.612(2)                                                                         | 71.870(2)                                                                          |
| $\gamma$ [°]                                               | 90                                                                                 | 86.689(2)                                                                          |
| Volume[Å <sup>3</sup> ]                                    | 3492.2(3)                                                                          | 1714.72(15)                                                                        |
| <i>Z</i> / <i>D</i> <sub>calcd.</sub> [g/cm <sup>3</sup> ] | 4/1.515                                                                            | 2/1.506                                                                            |
| $\mu$ [mm <sup>-1</sup> ]                                  | 10.517                                                                             | 4.851                                                                              |
| <i>F</i> (000)                                             | 1592.0                                                                             | 780.0                                                                              |
| $\theta$ range/deg                                         | 5.908-107.864                                                                      | 4.28-55.084                                                                        |
| Index ranges                                               | -12 ≤ <i>h</i> ≤ 13<br>-31 ≤ <i>k</i> ≤ 29<br>-15 ≤ <i>l</i> ≤ 14                  | -9 ≤ <i>h</i> ≤ 13<br>-16 ≤ <i>k</i> ≤ 16<br>-17 ≤ <i>l</i> ≤ 18                   |
| Collected data                                             | 39278                                                                              | 16048                                                                              |
| Unique data                                                | 6363<br>[ <i>R</i> <sub>int</sub> = 0.0740,<br><i>R</i> <sub>sigma</sub> = 0.0578] | 7817<br>[ <i>R</i> <sub>int</sub> = 0.0528,<br><i>R</i> <sub>sigma</sub> = 0.0693] |
| Completeness                                               | 100%                                                                               | 99%                                                                                |
| Data/parameters                                            | 6363/1116/517                                                                      | 7817/0/347                                                                         |
| GOF on <i>F</i> <sup>2</sup>                               | 1.114                                                                              | 1.032                                                                              |
| Final <i>R</i> indices [ <i>I</i> > 2σ( <i>I</i> )]        | <i>R</i> <sub>1</sub> = 0.0952<br><i>wR</i> <sub>2</sub> = 0.1809                  | <i>R</i> <sub>1</sub> = 0.0366<br><i>wR</i> <sub>2</sub> = 0.0939                  |
| Final <i>R</i> indices [all data]                          | <i>R</i> <sub>1</sub> = 0.1342<br><i>wR</i> <sub>2</sub> = 0.1996                  | <i>R</i> <sub>1</sub> = 0.0397<br><i>wR</i> <sub>2</sub> = 0.0963                  |
| Largest diff. peak/hole (e·Å <sup>-3</sup> )               | 5.43/-4.54                                                                         | 1.09/-1.32                                                                         |

**Table S3.** Crystal data and structure refinements for **5-7**.

| Complex                                                    | <b>5·2C<sub>4</sub>H<sub>8</sub>O</b>                                                                                        | <b>6</b>                                                                                                     | <b>7·CH<sub>2</sub>Cl<sub>2</sub></b>                                                                          |
|------------------------------------------------------------|------------------------------------------------------------------------------------------------------------------------------|--------------------------------------------------------------------------------------------------------------|----------------------------------------------------------------------------------------------------------------|
| Formula                                                    | C <sub>56</sub> H <sub>128</sub> Cl <sub>8</sub> N <sub>8</sub> O <sub>4</sub> P <sub>4</sub> Ru <sub>2</sub> U <sub>2</sub> | C <sub>40</sub> H <sub>96</sub> Cl <sub>6</sub> N <sub>8</sub> P <sub>4</sub> Rh <sub>2</sub> U <sub>2</sub> | C <sub>42</sub> H <sub>100</sub> Cl <sub>10</sub> N <sub>8</sub> P <sub>4</sub> Ir <sub>2</sub> U <sub>2</sub> |
| <i>Mr</i> [g/mol]                                          | 2063.34                                                                                                                      | 1707.70                                                                                                      | 2056.13                                                                                                        |
| Temp. [K]                                                  | 296.15                                                                                                                       | 193.00                                                                                                       | 193.00                                                                                                         |
| Crystal system                                             | monoclinic                                                                                                                   | monoclinic                                                                                                   | monoclinic                                                                                                     |
| Space group                                                | P2 <sub>1</sub> /n                                                                                                           | P2 <sub>1</sub> /n                                                                                           | P2 <sub>1</sub> /n                                                                                             |
| <i>a</i> [Å]                                               | 14.973(3)                                                                                                                    | 10.7929(4)                                                                                                   | 11.5738(6)                                                                                                     |
| <i>b</i> [Å]                                               | 12.2805(19)                                                                                                                  | 26.3286(10)                                                                                                  | 16.9717(9)                                                                                                     |
| <i>c</i> [Å]                                               | 22.594(4)                                                                                                                    | 11.1451(4)                                                                                                   | 18.2716(9)                                                                                                     |
| $\alpha$ [°]                                               | 90                                                                                                                           | 90                                                                                                           | 90                                                                                                             |
| $\beta$ [°]                                                | 102.793(6)                                                                                                                   | 110.635(2)                                                                                                   | 96.101(2)                                                                                                      |
| $\gamma$ [°]                                               | 90                                                                                                                           | 90                                                                                                           | 90                                                                                                             |
| Volume[Å <sup>3</sup> ]                                    | 4051.2(11)                                                                                                                   | 2963.83(19)                                                                                                  | 3568.7(3)                                                                                                      |
| <i>Z</i> / <i>D</i> <sub>calcd.</sub> [g/cm <sup>3</sup> ] | 2/1.691                                                                                                                      | 2/1.914                                                                                                      | 2/1.913                                                                                                        |
| $\mu$ [mm <sup>-1</sup> ]                                  | 4.737                                                                                                                        | 16.493                                                                                                       | 8.738                                                                                                          |
| <i>F</i> (000)                                             | 2040.0                                                                                                                       | 1656.0                                                                                                       | 1952.0                                                                                                         |
| $\theta$ range/deg                                         | 4.334-54.938                                                                                                                 | 5.84-108.086                                                                                                 | 3.984-55                                                                                                       |
| Index ranges                                               | -17 ≤ <i>h</i> ≤ 19<br>-15 ≤ <i>k</i> ≤ 15<br>-29 ≤ <i>l</i> ≤ 26                                                            | -13 ≤ <i>h</i> ≤ 13<br>-30 ≤ <i>k</i> ≤ 31<br>-13 ≤ <i>l</i> ≤ 13                                            | -15 ≤ <i>h</i> ≤ 13<br>-21 ≤ <i>k</i> ≤ 22<br>-23 ≤ <i>l</i> ≤ 23                                              |
| Collected data                                             | 33633                                                                                                                        | 29584                                                                                                        | 31309                                                                                                          |
| Unique data                                                | 9177<br>[ <i>R</i> <sub>int</sub> = 0.0992,<br><i>R</i> <sub>sigma</sub> = 0.0927]                                           | 5437<br>[ <i>R</i> <sub>int</sub> = 0.0685,<br><i>R</i> <sub>sigma</sub> = 0.0523]                           | 8174<br>[ <i>R</i> <sub>int</sub> = 0.0430,<br><i>R</i> <sub>sigma</sub> = 0.0381]                             |
| Completeness                                               | 99%                                                                                                                          | 99%                                                                                                          | 99%                                                                                                            |
| Data/parameters                                            | 9177/131/411                                                                                                                 | 5437/12/292                                                                                                  | 8174/54/338                                                                                                    |
| GOF on <i>F</i> <sup>2</sup>                               | 0.987                                                                                                                        | 1.025                                                                                                        | 1.030                                                                                                          |
| Final indices<br>[ <i>I</i> > 2σ( <i>I</i> )]              | <i>R</i> <sub>1</sub> = 0.0717<br>w <i>R</i> <sub>2</sub> = 0.1951                                                           | <i>R</i> <sub>1</sub> = 0.0485<br>w <i>R</i> <sub>2</sub> = 0.1316                                           | <i>R</i> <sub>1</sub> = 0.0294<br>w <i>R</i> <sub>2</sub> = 0.0621                                             |

|                                                          |   |                                   |                                   |                                   |
|----------------------------------------------------------|---|-----------------------------------|-----------------------------------|-----------------------------------|
| Final indices [all data]                                 | R | $R_1 = 0.0965$<br>$wR_2 = 0.2244$ | $R_1 = 0.0613$<br>$wR_2 = 0.1402$ | $R_1 = 0.0394$<br>$wR_2 = 0.0660$ |
| Largest diff. peak/hole<br>( $e \cdot \text{\AA}^{-3}$ ) |   | 1.36/-1.70                        | 3.09/-2.24                        | 1.55/-0.93                        |

---

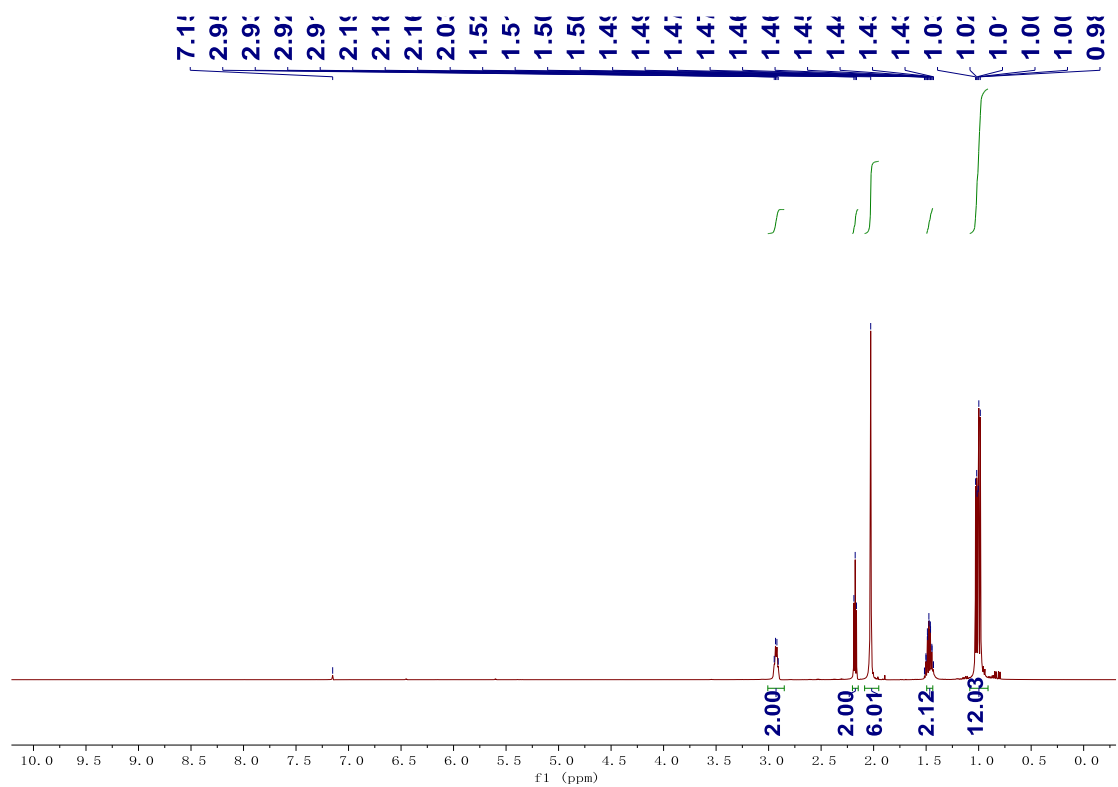

Figure S1.  $^1\text{H}$  NMR spectrum of ligand L3 in benzene- $\text{d}_6$ .

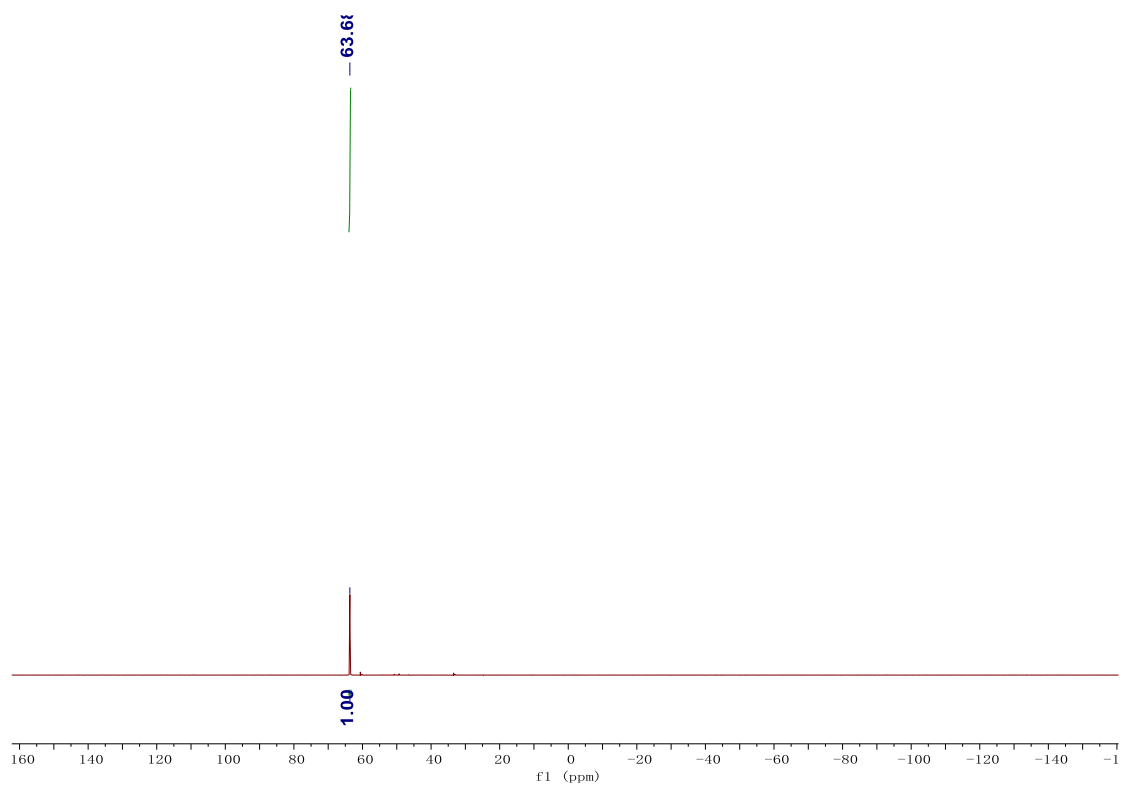

Figure S2.  $^{31}\text{P}\{^1\text{H}\}$  NMR spectrum of ligand L3 in benzene- $\text{d}_6$ .

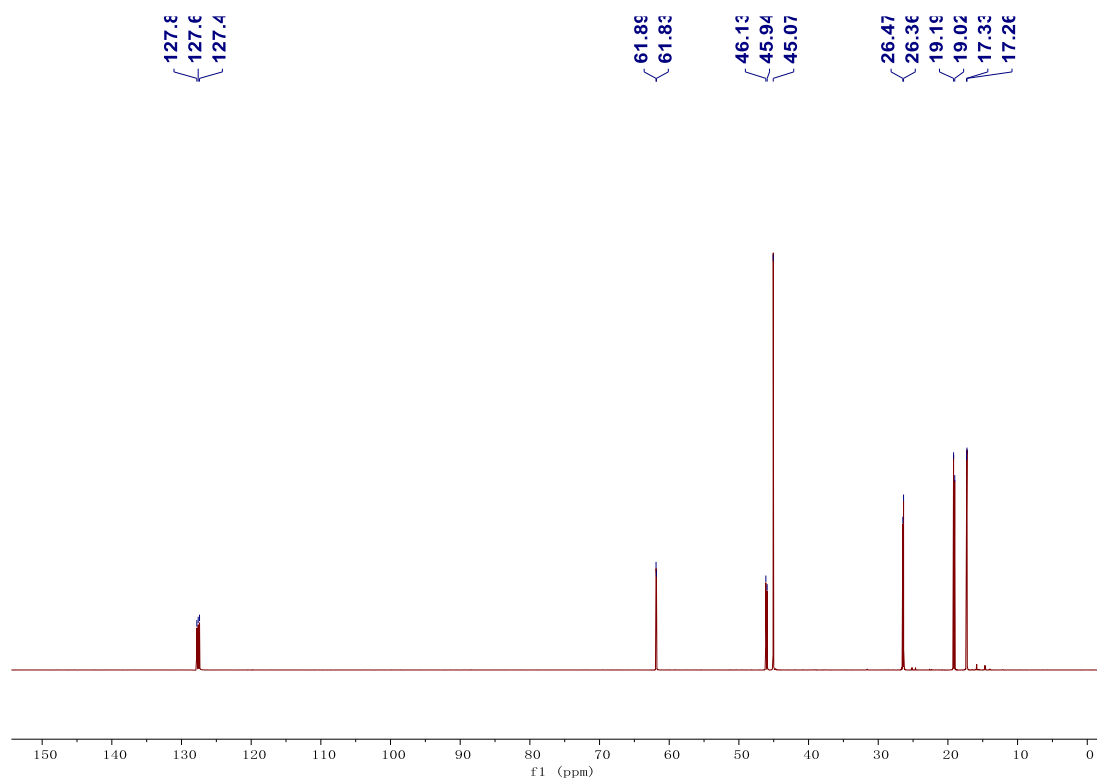

**Figure S3.**  $^{13}\text{C}\{^1\text{H}\}$  NMR spectrum of ligand **L3** in benzene- $\text{d}_6$ .

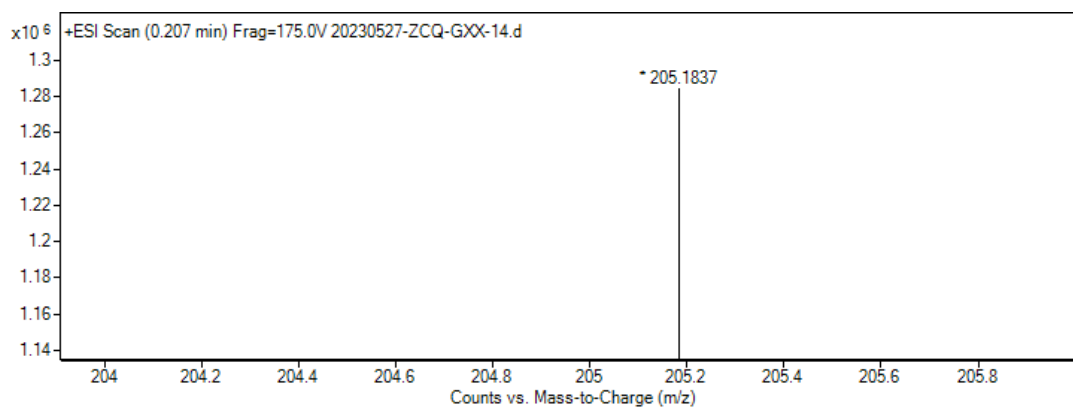

**Figure S4.** High resolution mass spectrum of **L3** in acetonitrile.

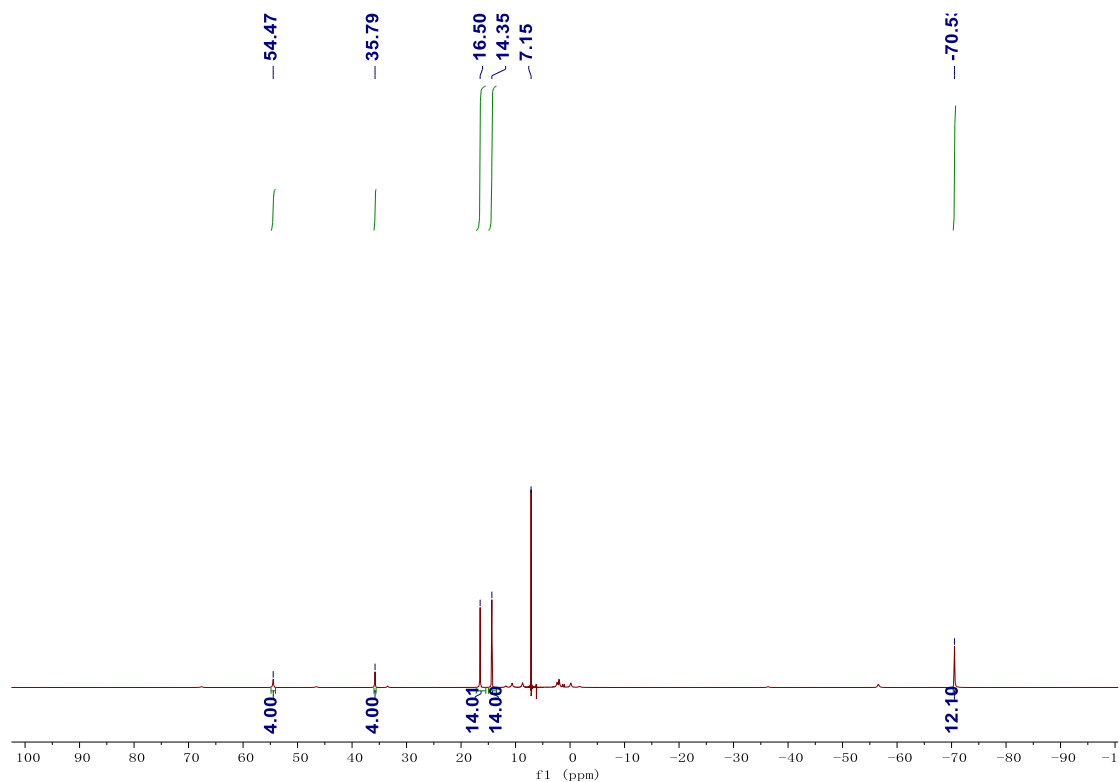

Figure S5.  $^1\text{H}$  NMR spectrum of complex 1 in benzene- $d_6$ .

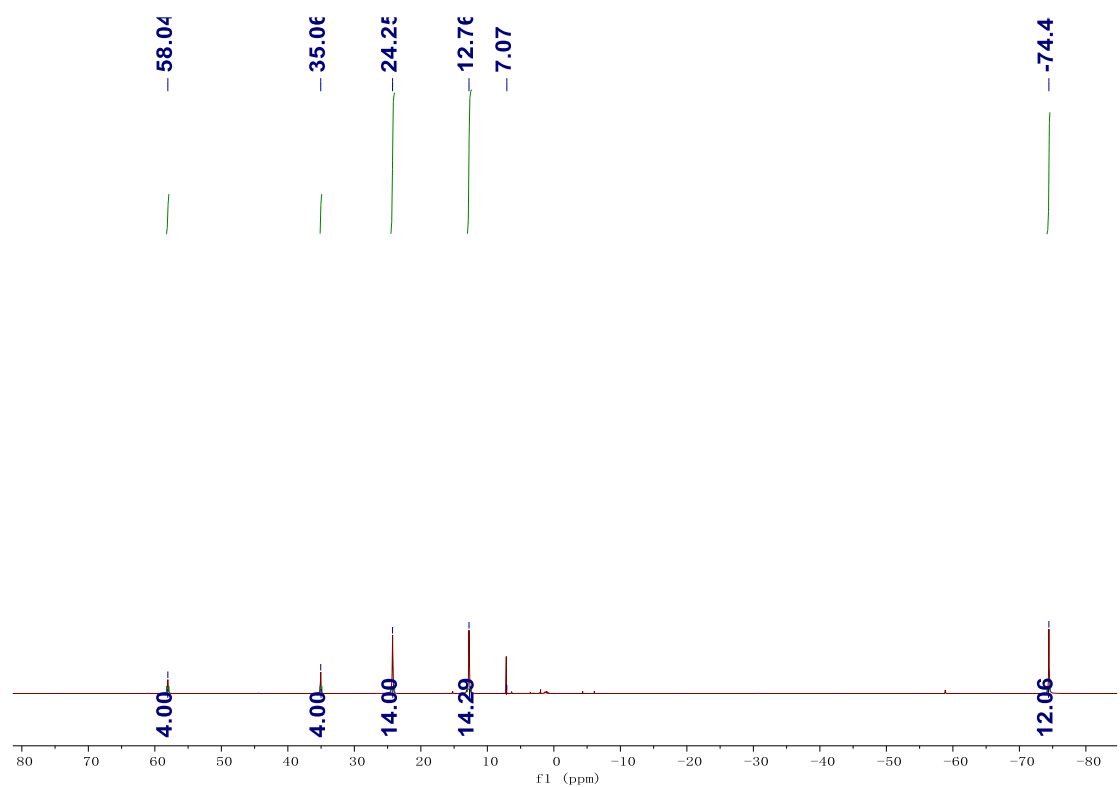

Figure S6.  $^1\text{H}$  NMR spectrum of complex 2 in benzene- $d_6$ .



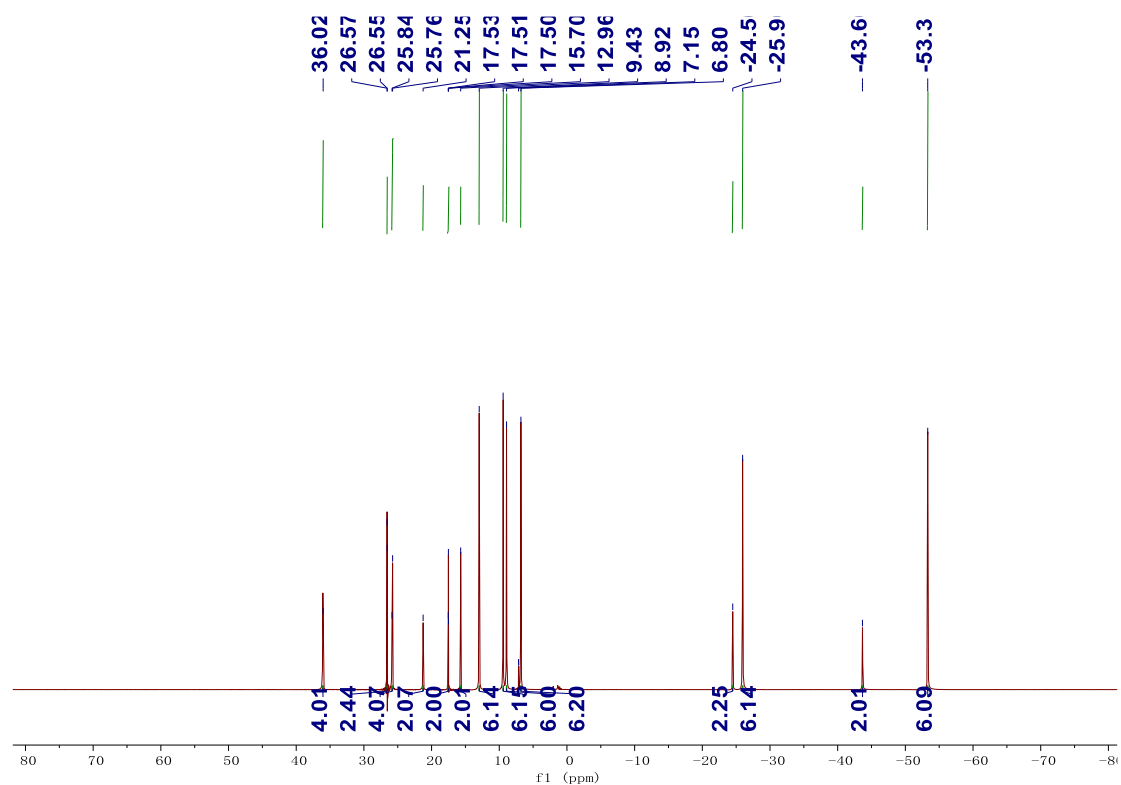

Figure S7.  $^1\text{H}$  NMR spectrum of complex **3** in benzene-  $\text{d}_6$ .

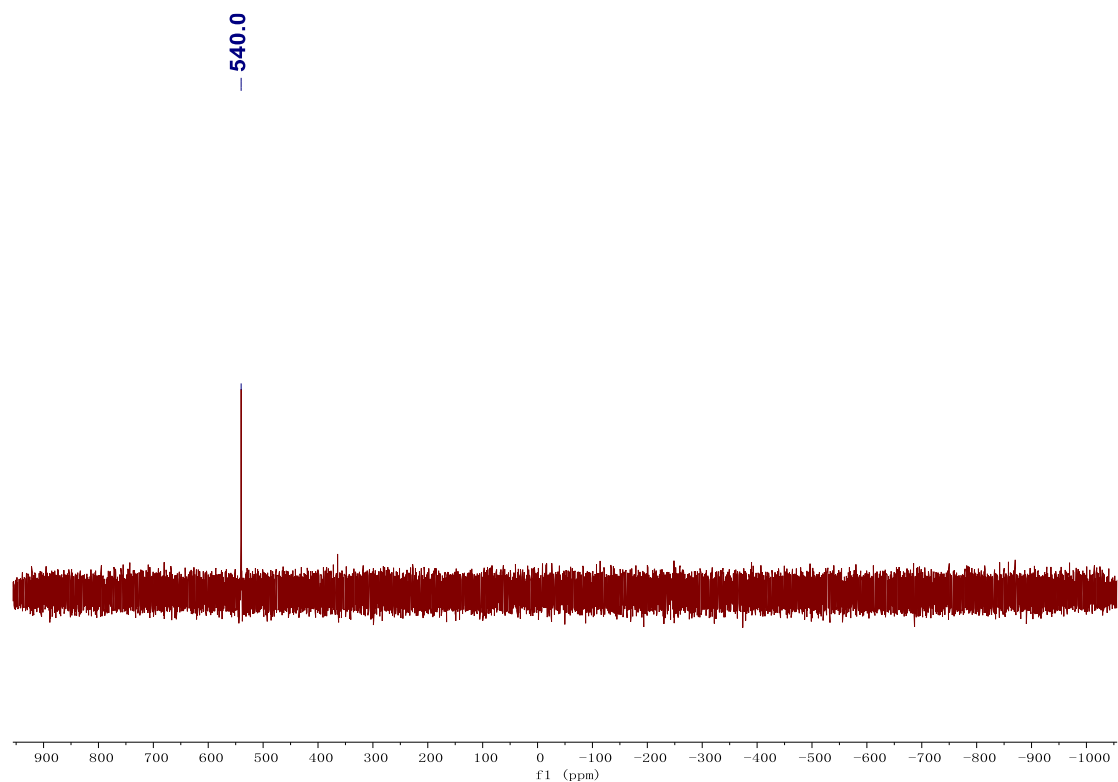

Figure S8.  $^{31}\text{P}\{^1\text{H}\}$  NMR spectrum of complex **3** in benzene-  $\text{d}_6$ .

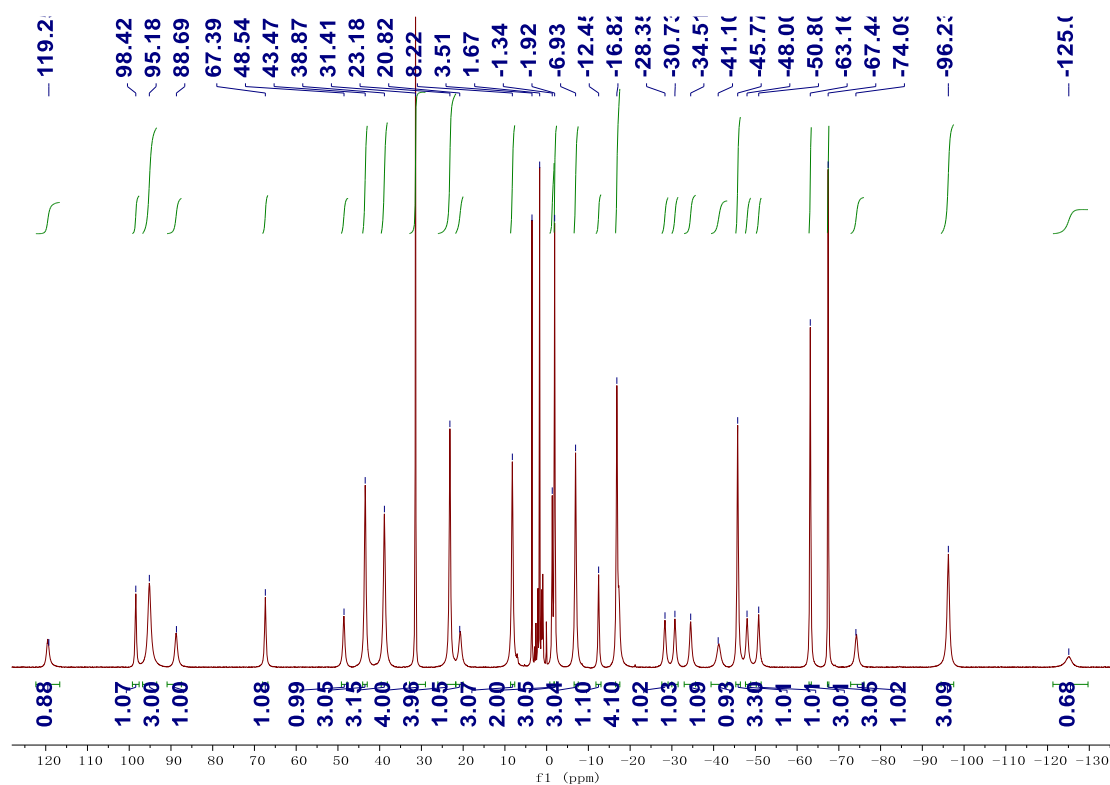

Figure S9.  $^1\text{H}$  NMR spectrum of complex **4** in tetrahydrofuran- $d_8$ .

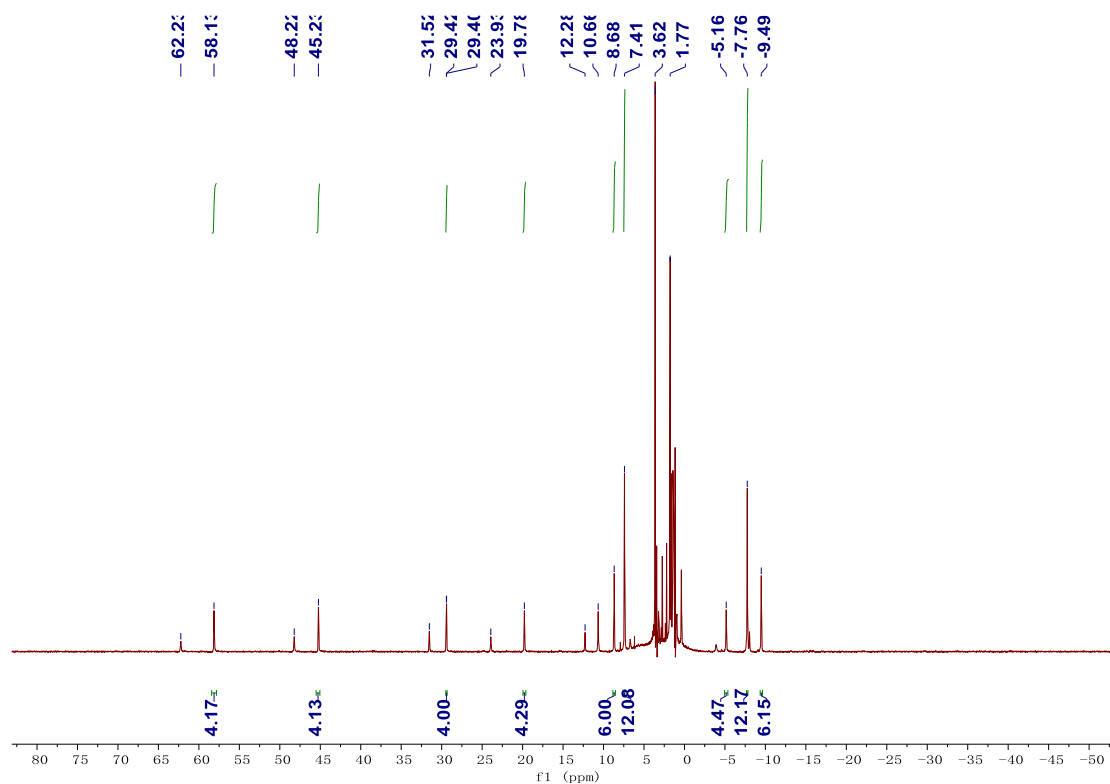

Figure S10. The *in-situ*  $^1\text{H}$  NMR spectrum for the synthesis of complex **5** in tetrahydrofuran- $d_8$ .

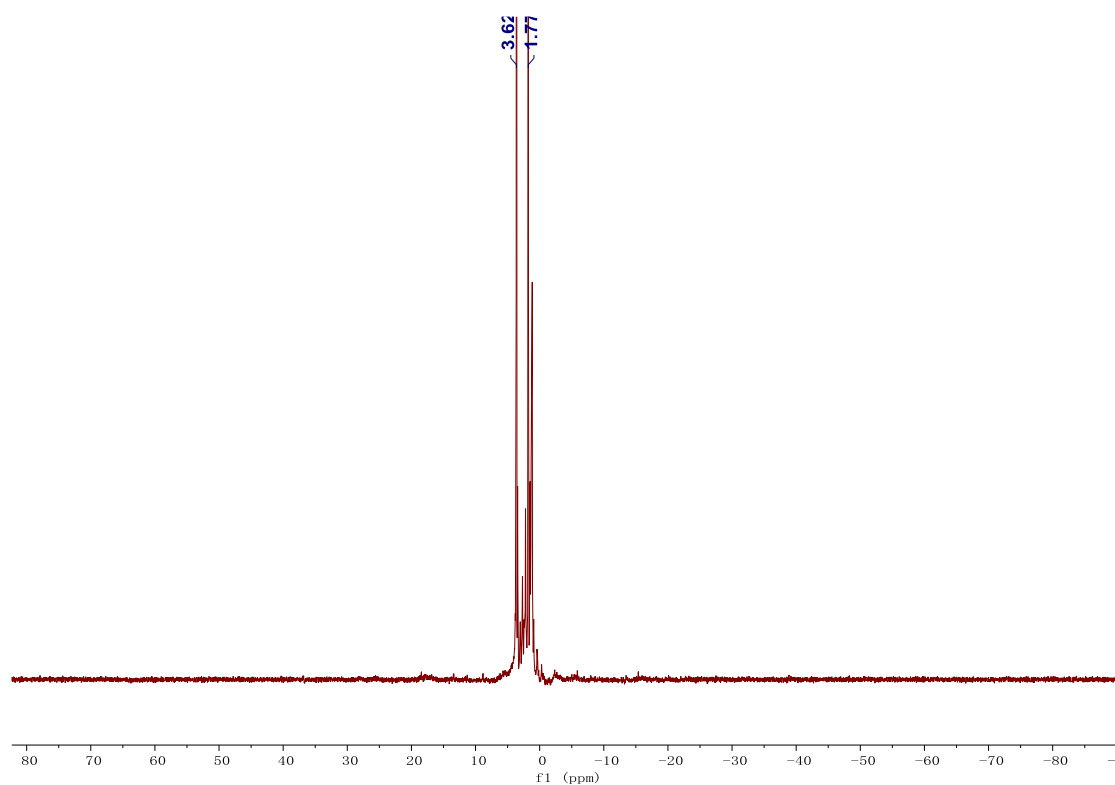

**Figure S11.** The *in-situ*  $^1\text{H}$  NMR spectrum for the synthesis of complex **6** in tetrahydrofuran- $\text{d}_8$ .

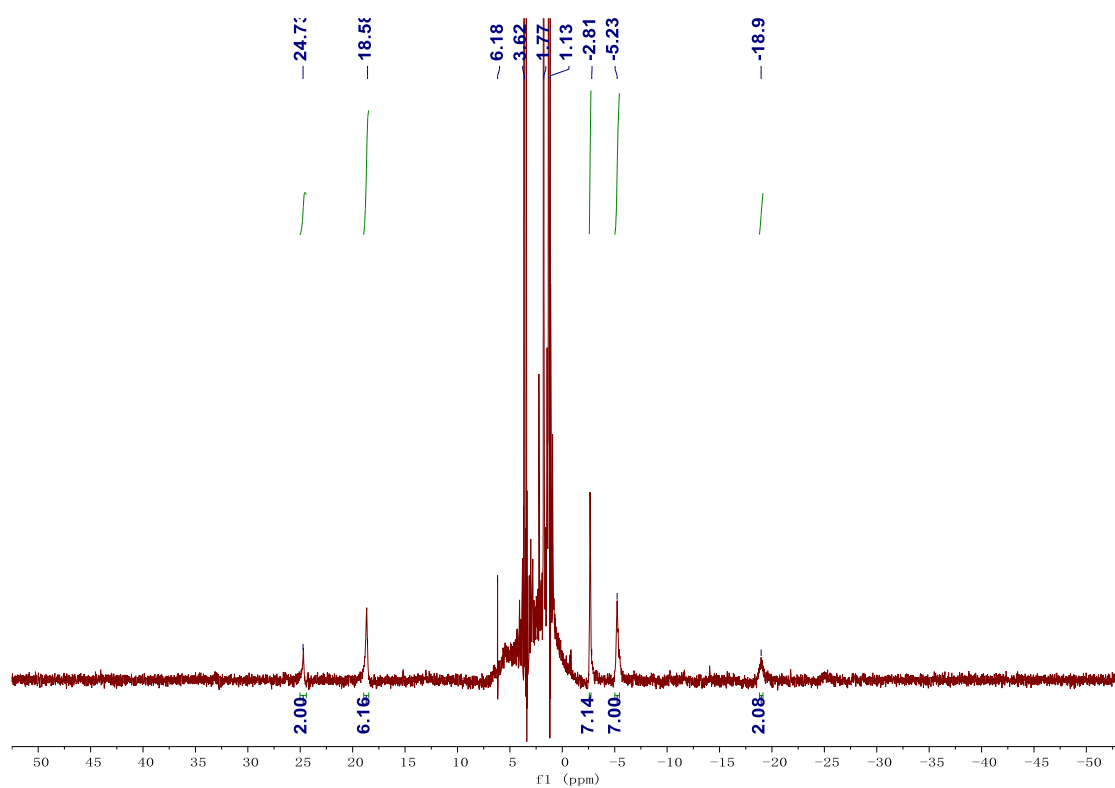

**Figure S12.** The *in-situ*  $^1\text{H}$  NMR spectrum for the synthesis of complex **7** in tetrahydrofuran- $\text{d}_8$ .
